# Supplementary material for: Full solution processed mesostructured optical resonators integrating colloidal semiconductor quantum dots
Source: Royal Society of Chemistry journal article supplement (doi:10.1039/c5nr03977k), 2015-01-01
Supplement: c5nr03977k1.pdf [file c5nr03977k1.pdf]

## Supporting Information

### Full Solution Processed Mesostructured Optical Resonators Integrating Colloidal Semiconductor Quantum Dots

Mauricio E. Calvo,<sup>1</sup> Nuria Hidalgo,<sup>1</sup> Roland Schierzholz,<sup>2</sup> András Kovacs,<sup>3</sup> Asunción Fernández,<sup>1</sup> Martín G. Bellino,<sup>4</sup> Galo J.A.A. Soler-Illia,<sup>4</sup> Hernán Míguez<sup>1,\*</sup>

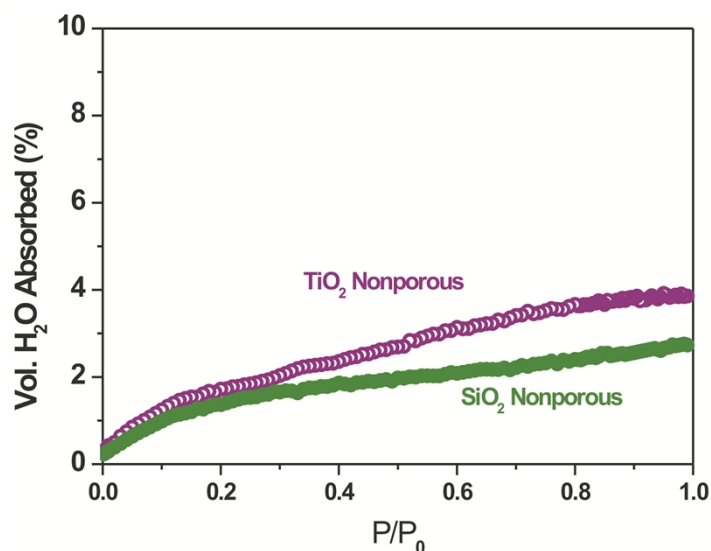

Figure S1. Typical water adsorption-desorption isotherms obtained by EEP obtained from the SiO<sub>2</sub> and TiO<sub>2</sub> low porosity films used in this work.

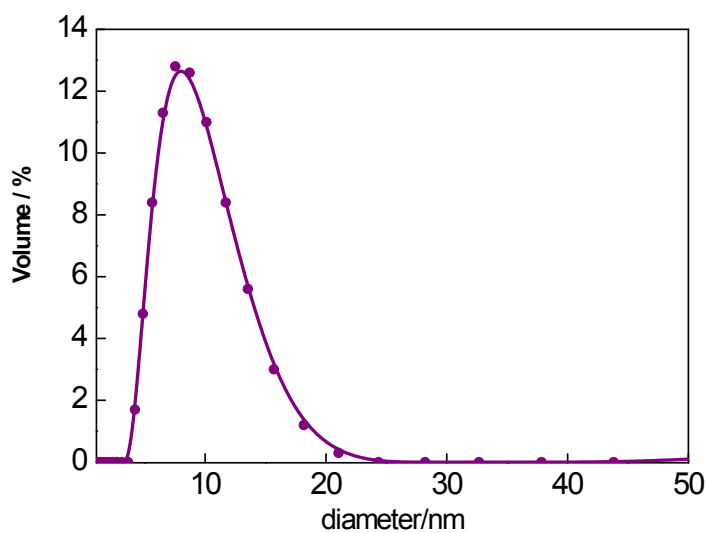

Figure S2. CSQDs particle size distribution measured by dynamic light scattering at a concentration of 5mg/ml in toluene.

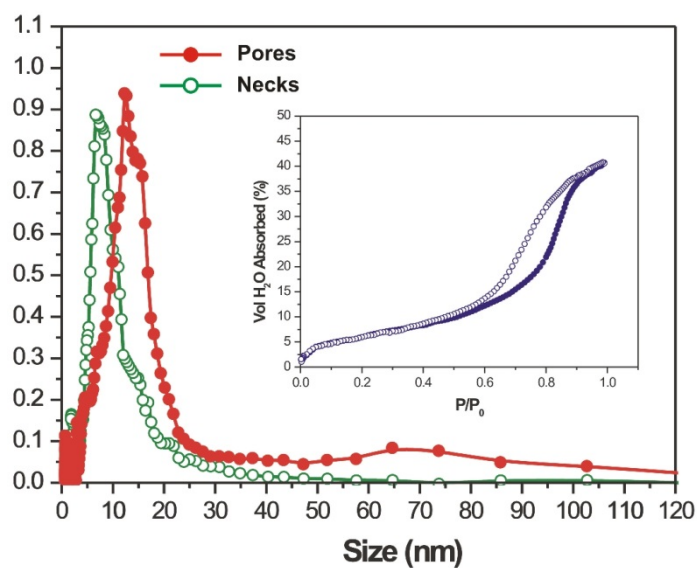

Figure S3. Typical pore and neck size distribution of bi-modal mesoporous  $\text{TiO}_2$  films obtained by water adsorption-desorption isotherms at 298 K (see inset).

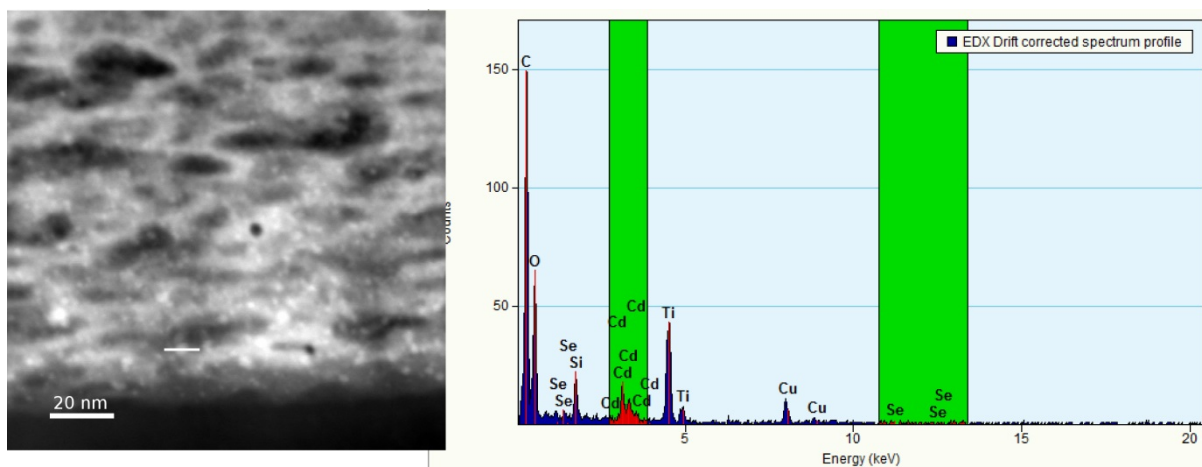

Figure S4. EDX line-scan indicated by the white line in the ADF image (left). At the particle position p4-p6 a clear Cd signal is detected.

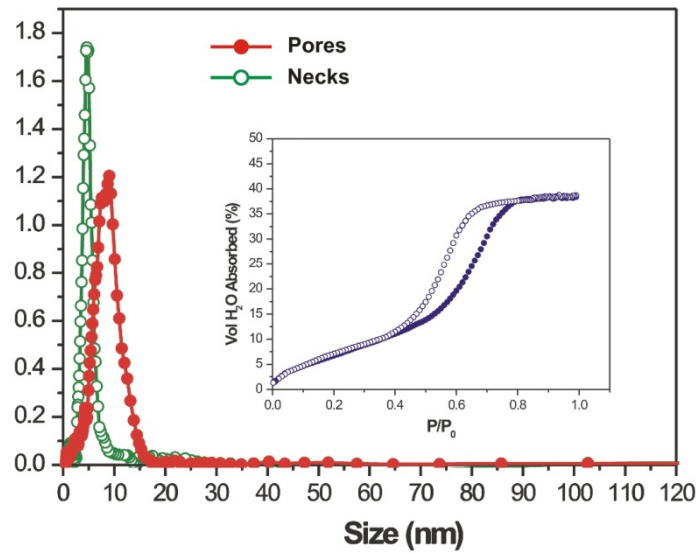

Figure S5. Pore and neck size distribution of mono-modal  $\text{TiO}_2$  films obtained by water adsorption-desorption isotherms at 298 K (see inset)

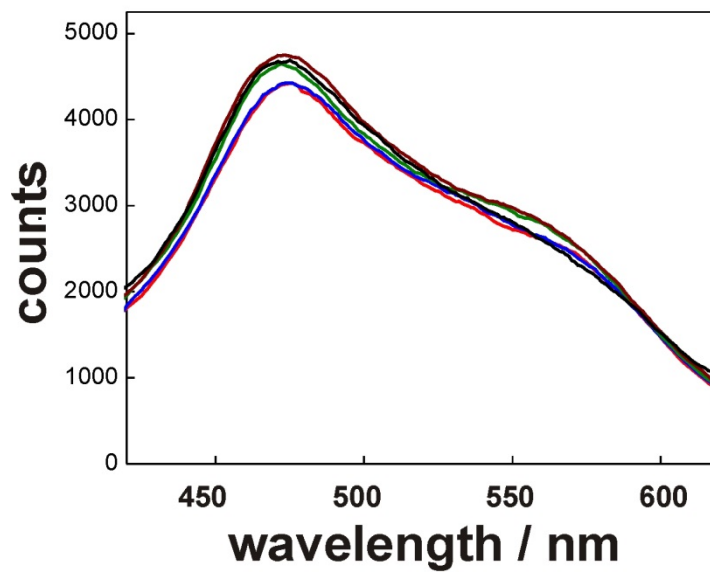

Figure S6. Spectral luminescence of CSQD included in a porous  $\text{TiO}_2$  layer at different collection angle. Luminescence spectra of the porous optical structure collected at 0 (black line), 15 (red line), 20 (blue line), 25 (green line) and 30 (brown line) degrees.
